# Supplementary material for: Label-free SERS detection of relevant bioanalytes on silver-coated carbon nanotubes: The case of cocaine
Source: Royal Society of Chemistry journal article supplement (doi:10.1039/b9nr00059c), 2009-01-01
Supplement: b9nr00059c.pdf [file b9nr00059c.pdf]

## Supplementary electronic information for:

### Label-free SERS detection of relevant bioanalytes on silver coated carbon nanotubes: The case of cocaine

5 Marcos Sanles-Sobrido,<sup>a</sup> Laura Rodríguez-Lorenzo,<sup>a</sup> Silvia Lorenzo-Abalde,<sup>b</sup> África González-Fernández,<sup>b</sup> Miguel A. Correa-Duarte,<sup>a,\*</sup> Ramón A. Alvarez-Puebla,<sup>a,\*</sup> Luis M. Liz-Marzán<sup>a</sup>

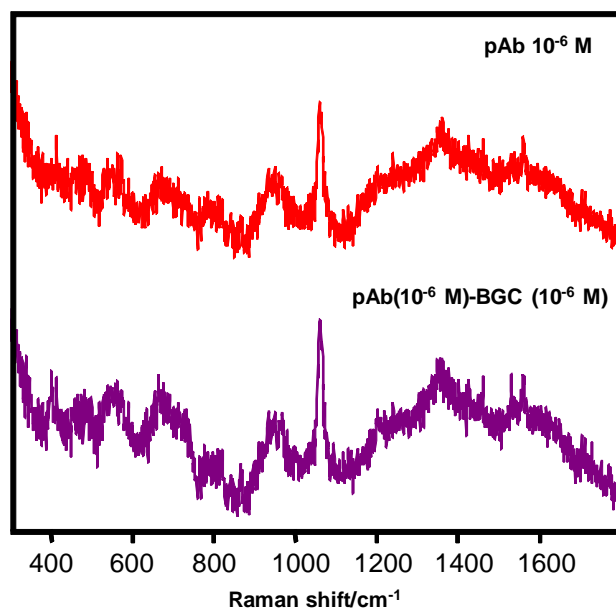

**Figure S1.** SERS spectra of polyclonal antibodies on CNT@Ag before and after exposure to BCG.
